# Supplementary material for: Platelet function is modified by common sequence variation in megakaryocyte super enhancers
Source: PubMed Central journal article supplement (PMC5511350; doi:10.1038/ncomms16058), 2017-07-13
Supplement: ncomms16058-s12.pdf [file ncomms16058-s12.pdf]

**Editorial Note:** this manuscript has been previously reviewed at another journal that is not operating a transparent peer review scheme. This document only contains reviewer comments and rebuttal letters for versions considered at Nature Communications.
